# Supplementary material
Source: PubMed Central journal article supplement (PMC2784151)
Supplement: NIHMS149293-supplement-2_si_002.pdf [file NIHMS149293-supplement-2_si_002.pdf]

Table 1. List of ion parameters of ions that were used to validate the SIMION-SDS-FDMC.

| Chemical                   | Ion                                               | Mass (amu) | $K_0$ ( $10^{-4} \text{ m}^2 \cdot \text{V}^{-1} \cdot \text{s}^{-1}$ ) | $\alpha_2$ ( $\text{Td}^{-2}$ ) | $\alpha_4$ ( $\text{Td}^{-4}$ ) |
|----------------------------|---------------------------------------------------|------------|-------------------------------------------------------------------------|---------------------------------|---------------------------------|
| 1. Hydrated Proton         | $\text{H}^+(\text{H}_2\text{O})_3$                | 55.00      | 2.34                                                                    | $1.78 \times 10^{-5}$           | $-4.91 \times 10^{-10}$         |
| 2. Hydroxyproline          | $(\text{C}_5\text{H}_9\text{NO}_3)\text{H}^+$     | 131.13     | 2.18                                                                    | $5.82 \times 10^{-6}$           | $-1.09 \times 10^{-10}$         |
| 3. Leucine                 | $(\text{C}_6\text{H}_{13}\text{NO}_2)\text{H}^+$  | 131.17     | 2.17                                                                    | $4.06 \times 10^{-6}$           | $0.79 \times 10^{-10}$          |
| 4. Hydrated Oxygen         | $\text{O}_2^-(\text{H}_2\text{O})_3$              | 86.00      | 2.13                                                                    | $1.93 \times 10^{-5}$           | $-4.30 \times 10^{-10}$         |
| 5. 2-Propanone (dimer)     | $(\text{C}_3\text{H}_6\text{O})_2\text{H}^+$      | 116.16     | 1.85                                                                    | $7.44 \times 10^{-6}$           | $-6.94 \times 10^{-10}$         |
| 6. 2-Dodecanone<br>(dimer) | $\text{C}_{12}\text{H}_{24}\text{O})_2\text{H}^+$ | 368.62     | 1.39                                                                    | $-2.16 \times 10^{-6}$          | $-0.84 \times 10^{-10}$         |
